1 **A Deep Learning Approach for Tissue Spatial Quantification**

2 **and Genomic Correlations of Histopathological Images**

3 Zixiao Lu<sup>1,#,a</sup>, Xiaohui Zhan<sup>2,3,#,b</sup>, Yi Wu<sup>3,c</sup>, Jun Cheng<sup>2,d</sup>, Wei Shao<sup>3,e</sup>, Dong Ni<sup>2,f</sup>, Zhi

4 Han<sup>3,g</sup>, Jie Zhang<sup>4,h</sup>, Qianjin Feng<sup>1,\*,i</sup>, Kun Huang<sup>3,\*,j</sup>

5 <sup>1</sup> *Guangdong Provincial Key Laboratory of Medical Image Processing, School of*  
6 *Biomedical Engineering, Southern Medical University, Guangzhou, 510515, China*

7 <sup>2</sup> *National-Regional Key Technology Engineering Laboratory for Medical Ultrasound,*  
8 *School of Biomedical Engineering, Health Science Center, Shenzhen University,*  
9 *Shenzhen, 518060, China*

10 <sup>3</sup> *Regenstrief Institute, Department of Medicine, Indiana University School of*  
11 *Medicine, Indianapolis, IN, 46202, USA*

12 <sup>4</sup> *Department of Medical and Molecular Genetics, Indiana University School of*  
13 *Medicine, Indianapolis, IN, 46202, USA*

14 #Co-first authors

15 \*Corresponding authors

16 E-mail: fengjq99@fimmu.com (Feng Q), [kunhuang@iu.edu](mailto:kunhuang@iu.edu) (Huang K)

17 <sup>a</sup> ORCID: 0000-0003-0809-8703

18 <sup>b</sup> ORCID: 0000-0003-1326-6601

19 <sup>c</sup> ORCID: 0000-0003-3838-7418

20 <sup>d</sup> ORCID: 0000-0001-5493-961X

21 <sup>e</sup> ORCID: 0000-0002-9401-1186

22 <sup>f</sup> ORCID: 0000-0002-9146-6003

23 <sup>g</sup> ORCID: 0000-0002-5603-8433

24 <sup>h</sup> ORCID: 0000-0001-6939-7905

25 <sup>i</sup> ORCID: 0000-0001-8647-0596

26 <sup>j</sup> ORCID: 0000-0002-8530-370X

27

28 **Running title:** *Lu Z et al / Tissue Quantification and Genomic Correlations*

29

30 Total counts of words (from “Introduction” to “Conclusions”): 3613

31 Total counts of references: 36

32 Total counts of figures: 5

33 Total counts of tables: 3

34 Supplementary figures: 1

35 Supplementary tables: 1

36 **Abstract**

37 Epithelial and stromal tissue are components of the tumor microenvironment and play  
38 a major role in tumor initiation and progression. Distinguishing stroma from epithelial  
39 tissues is critically important for spatial characterization of the tumor  
40 microenvironment. We propose an image analysis pipeline based on a Convolutional  
41 Neural Network (CNN) model to classify epithelial and stromal regions in  
42 whole-slide images. The CNN model was trained using well-annotated breast cancer  
43 tissue microarrays and validated with images from The Cancer Genome Atlas  
44 (TCGA) project. Our model achieves a classification accuracy of 91.02%, which  
45 outperforms other state-of-the-art methods. Using this model, we generated  
46 pixel-level epithelial/stromal tissue maps for 1,000 TCGA breast cancer slide images  
47 that are paired with gene expression data. We subsequently estimated the epithelial  
48 and stromal ratios and performed correlation analysis to model the relationship  
49 between gene expression and tissue ratios. Gene Ontology enrichment analyses of  
50 genes that were highly correlated with tissue ratios suggest the same tissue was  
51 associated with similar biological processes in different breast cancer subtypes,  
52 whereas each subtype had its own idiosyncratic biological processes governing the  
53 development of these tissues. Taken all together, our approach can lead to new  
54 insights in exploring relationships between image-based phenotypes and their  
55 underlying genomic data and biological processes for all types of solid tumors.

56

57 **KEYWORDS:** Whole-slide tissue image; Deep learning; Integrative genomics; Breast  
58 cancer.

## 59 **Introduction**

60 Most solid tumors are composed of many tissue types including cancer cells, stroma,  
61 and epithelium. The interaction of tissues within such complex neoplasms defines the  
62 tumor microenvironment and this variably contributes to cancer initiation,  
63 progression, and therapeutic responses. For example, breast cancer epithelial cells of  
64 the mammary ducts are commonly the site of tumor initiation, while stromal tissue  
65 dynamics drive invasion and metastasis [1]. Tumor-to-stroma ratios of H&E stained  
66 images are therefore an important prognostic factor [2,3], and distinguishing stromal  
67 from epithelial tissue in histological images constitutes a basic, but crucial, task for  
68 cancer pathology. Classification methods (*i.e.* pre-processing, training classifiers with  
69 carefully selected features, and patch-level classification) are the most common  
70 automated computational methods for tissue segmentation [4,5]. For instance, Bunyak  
71 et al. [6] combined traditional feature selection methods and classification methods to  
72 perform segmentation of epithelial and stromal tissues on a tissue microarray (TMA)  
73 database. While this approach is viable, it can be time-consuming and inefficient  
74 given the feature selection process. Convolutional Neural Networks (CNN) models  
75 have the potential to improve analysis time and performance. Recently, deep CNN  
76 models have greatly boosted the performance of natural image analysis techniques  
77 such as image classification [7], object detection [8] and semantic segmentation  
78 [9,10], and biomedical image analysis [11–13]. Additionally, Ronneberger et al. [14]  
79 proposed implementation of a U-Net architecture to capture context and a symmetric  
80 expanding path that enables precise localization in biomedical image segmentation.  
81 CNN models have also been combined with traditional approaches to enhance the  
82 segmentation performance of epithelial and stromal regions [11,12].  
83 Despite breakthroughs in the application of CNN models to medical image analysis,  
84 automated classification of epithelial and stromal tissues in Whole Slide Tissue  
85 Images (WSI) remains challenging due to the large size of WSI. WSI contain billions  
86 of pixels, and machine learning methods are limited by the technical hurdles of

87 working with large datasets [13]. Several solutions based on deep learning for  
88 classification of WSI have been proposed. A context-aware stacked CNN was  
89 proposed for the classification of breast WSI into multiple categories, such as  
90 normal/benign, ductal carcinoma in situ and invasive ductal carcinoma [15]. Saltz et  
91 al. presented a patch-based CNN to classify WSI into glioma and non-small-cell lung  
92 carcinoma subtypes [16,17].

93 Additionally, commercial software has been developed to aid in quantitative and  
94 objective analyses of tissue WSI. Among them is GENIE (Leica/ Aperio), a tool with  
95 proprietary algorithms which incorporate deep learning. While many of its  
96 functionalities are designed to handle specific biomarkers using immunohistochemical  
97 (IHC) or fluorescent images, for H&E images, tissue segmentation requires  
98 user-defined regions of interests (ROI). Similarly, HALO (Indica Labs) and  
99 Visiopharm (Hoersholm) provide a toolbox for histopathological image analysis. The  
100 toolbox includes unsupervised algorithms for tissue segmentation that require manual  
101 configuration of parameters and usually underperform supervised methods. The  
102 AQUA system (HistoRx) focuses on estimating tissue scores on TMA based on IHC  
103 staining by measuring protein expression within defined ROI. Therefore, reliable  
104 systems that enable both fully-automatic tissue segmentation and quantified analysis  
105 for H&E whole-slide images are still in great demand.

106 In this work, we propose a WSI processing pipeline that utilizes deep learning to  
107 perform automatic segmentation and quantification of epithelial and stromal tissues  
108 for breast cancer WSI from The Cancer Genome Atlas (TCGA). The TCGA data  
109 portal provides both clinical information and paired molecular data [18,19]. This  
110 offers the opportunity to identify relationships between computational histopathologic  
111 image features and the corresponding genomic information, which greatly informs  
112 research into the molecular basis of tumor cell and tissue morphology [20–22], as well  
113 as important issues such as immune-oncology therapy [17].

114 We first trained and validated a deep CNN model on annotated H&E stained  
115 histologic image patches, then successfully applied the WSI processing pipeline to  
116 process 1,000 TCGA breast cancer WSI to segment and quantify epithelial and  
117 stromal tissues. Spatial quantification and correlations with genomic data of both  
118 tissue types for three breast cancer subtypes (ER-positive, ER-negative and triple  
119 negative) were estimated based on the high-resolution global tissue segmentation  
120 maps. Gene Ontology (GO) enrichment can indicate when such tissues are associated  
121 with similar biological processes in different breast cancer subtypes, whereas each  
122 subtype has its own idiosyncratic biological processes governing the development of  
123 these tissues. These results are consistent with underlying biological processes for  
124 cancer development, which further affirms the robustness of our image processing  
125 method.

126 Spatial characterization of different tissues in histopathological images has shown  
127 significant diagnostic and prognostic value, but human assessment of these features is  
128 time-consuming and often infeasible for large-scale studies. This study contributes an  
129 innovative automated deep-learning analysis pipeline that will enable rapid, accurate  
130 quantification of epithelial and stromal tissues from WSI of cancer samples. Such  
131 approaches are useful because they may be used for the quantification of tissue-level  
132 epithelial/stromal/cancer phenotypes, which in turn may be integrated with other  
133 biomedical data. For this reason, we demonstrate how model-generated outputs may  
134 be correlated with gene expression and how this may lead to new insights about  
135 genetic mechanisms that contribute to tumor microenvironment variability in breast  
136 cancer. Additional contributions of this manuscript are that the approach, data, and  
137 demonstrated use of the pipeline could be applied to other cancers to improve tissue  
138 quantification. To the best of our knowledge, this is the first study to provide  
139 pixel-level tissue segmentation maps of TCGA image data.

## 140 **Method**

### 141 **Datasets**

142 Two breast cancer image sets were used in this study: (1) The Cancer Genome Atlas  
143 (TCGA) portal; (2) the Stanford Tissue Microarray Database (sTMA) [2]. The sTMA  
144 database consisted of a total of 157 H&E stained rectangular image regions ( $1128 \times$   
145  $720$  pixels) using 20X objective lens, which were acquired from two independent  
146 cohorts: 106 samples from Netherlands Cancer Institute (NKI) and 51 samples from  
147 Vancouver General Hospital (VGH). Each image of sTMA was manually annotated  
148 with epithelial and stromal tissues by pathologists. The TCGA cohort samples include  
149 matched H&E stained WSI, gene expression data, and clinical information. Patients  
150 with missing expression data or images with cryo-artifacts deemed too severe were  
151 excluded, leaving a selected set of 1,000 samples. Since the TCGA clinical  
152 information includes subtyping information, we further categorized the selected  
153 samples into three breast cancer subtypes for more specific biological analysis:  
154 ER-positive, ER-negative and triple negative. Demographic and clinical information  
155 for both sTMA and TCGA cohorts are summarized in **Table 1**.

## 156 **Overview of the workflow**

157 **Figure 1** outlines our workflow for both image processing and biological analysis.  
158 **Figure 1A** shows the detailed structure of our deep CNN model for tissue  
159 segmentation. **Figure 1B** is the whole-slide image processing pipeline. **Figure 1C**  
160 shows an overview of the biological analysis of gene expression data and image  
161 features. Details of each part are described in the following subsection.

## 162 **CNN model for tissue segmentation**

163 Given an RGB image of height  $H$ , width  $W$ , and color channels  $C$ , the goal of  
164 segmentation is to predict a label map with size  $H \times W$  where each pixel is labeled  
165 with a category. CNN-based framework for segmentation fundamentally consists of  
166 encoding and decoding counterparts.

167 The encoding block is derived from classification models which perform  
168 down-sampling operators to capture global information from input images.  
169 Max-pooling is the most commonly adopted operations in encoding, which integrates

170 neighbouring pixels to learn invariance from local image transformation. More  
171 recently, dilated convolution was proposed to control spatial resolution, and thus  
172 enable dense feature extraction. Given a 1-D input signal  $x[i]$  with a filter  $w[k]$  of  
173 length  $K$ , the output of dilated convolution is defined as:

$$174 \quad y[i] = \sum_{k=1}^K x[i + r \cdot k]w[k] \quad (1)$$

175 where  $r$  is the stride in the sampling input signal, referred to as *rate*. By filling zeros  
176 between pixels in the filter, dilated convolution can enlarge receptive fields without  
177 substantially increasing computational cost.

178 We carefully constructed our deep hierarchical segmentation model using specific  
179 strategies in both encoder and decoder, as shown in **Figure 1A**. The ResNet-101  
180 structure [7], which contains 101 convolution layers, was adopted as the backbone of  
181 our proposed model. Since dilated convolution inserts zeros between pixels in the  
182 filter, it can enlarge receptive fields without substantially increasing computational  
183 cost. The encoder of our model inherited the first three blocks of ResNet-101, while  
184 the rest were modified into six dilated convolution blocks, each of which further  
185 contained four ResUnits with different dilation rates. This configuration was inspired  
186 by the success of the atrous spatial pyramid pooling (DeepLab-ASPP) approach from  
187 Chen et al. [10], which captures objects as well as image context at multiple scales,  
188 and thus robustly improves the segmentation performance. In our work, the  
189 modification of convolution layers was conducted to ensure that our encoder learned  
190 both tissue structures and contextual information for the next phase of processing. In  
191 the decoding step, we adopted a multi-channel convolution approach to generate  
192 high-resolution segmentation maps. Given a feature map of dimension  $h \times w \times c$ ,  
193 multi-channel convolution first generated features of  $h \times w \times (r^2 \times c)$ , where  $r$  is the  
194 upsampling rate. Then the features were reshaped to obtain upsampled features of  
195  $H' \times W' \times c$ , where  $H' = h \times r$ ,  $W' = w \times r$ . To this end, we stretched each individual  
196 pixel in the small feature map to the channel of  $r^2 \times c$  so that it corresponded to a  
197 fixed area ( $r \times r$ ) in the upsampled output map. We applied four parallel dilated



198 multi-channel convolutions with a range of dilation rates and added all of their  
199 outputs pixel by pixel in order to further exploit multi-scale contextual information  
200 from the encoding feature map.

201 We next used sTMA to train our CNN model in a five-folder-cross-validation. The  
202 proposed model was implemented using MXNet toolbox. Parameters in the encoder  
203 were initialized with pre-trained weights from Deep-Lab V2 [10], while the decoder  
204 layers were randomly initialized by Xavier method. Due to GPU memory limitations  
205 (8 GB for GeForce GTX 1080), we randomly cropped  $600 \times 600$  patches from the  
206 raw images and performed random mirror and random crop as data augmentation in  
207 the training stage.

### 208 **WSI processing pipeline**

209 During biopsy slide examination, pathologists search for a region-of-interest (ROI)  
210 that contains cancer cells and conduct diagnostic assessment. Inspired by these human  
211 analysis steps, we built an automatic pipeline to perform tissue segmentation on WSI,  
212 as shown in **Figure 1B**. Our WSI processing pipeline consists of two parts: 1)  
213 automatic identification of ROI, and 2) epithelial and stromal tissue segmentation on  
214 the ROI. Given a WSI  $I$ , we first downsampled  $I$  into  $I'$  at a factor of 16 in both  
215 horizontal and vertical directions. Then we converted  $I'$  from RGB color space to  
216 CIELAB color space ( $L^*a^*b^*$ ), denoted as  $I'_{lab}$ . Since the  $L^*$  channel in  $L^*a^*b^*$   
217 color space represents the brightness, we extracted the  $a^*$  and  $b^*$  values  
218 representing color components in  $I'_{lab}$  and obtained a new image  $I'_{ab}$ . Each pixel in  
219  $I'_{ab}$  is then a 2-dimensional vector. Next, we applied K-means clustering algorithm  
220 ( $K=2$ ) to divide the pixels of  $I'_{ab}$  into two groups. Considering that corners of  
221 pathology images are usually unstained, we classified pixels in the same cluster as the  
222 upper-left pixel in  $I'_{ab}$  as background, while the other pixels were classified as  
223 foreground. In this way, we generated a binary mask  $M^1$ , where 0 and 1 in  $M^1$   
224 correspond to background and foreground pixels in  $I'_{ab}$ , respectively. Denoting the  
225 smallest rectangle region that contains the largest connected component in  $M^1$  as

226  $F_m$ , we identified the ROI  $F_I$  by mapping the coordinates of  $F_m$  onto  $I$ . Finally,  $F_I$   
227 was cropped from  $I$  for downstream processing.

228 We split  $F_I$  into patches of  $1128 \times 720$  pixels to fully utilize the proposed CNN  
229 model for tissue segmentation. Patches with more than 80% background were  
230 discarded. The retained patches were then fed into the CNN model and all the  
231 patch-level predictions were combined to generate a global tissue mask  $M^2$  for  $F_I$ .

### 232 **Tissue quantification and biological analysis**

233 We applied our WSI processing pipeline on 1,000 TCGA breast cancer WSI for  
234 further biological analysis, as shown in **Figure 1C**. For each WSI  $I$ , we performed  
235 tissue spatial quantification based on its tissue mask  $M^2$  derived from our method.  
236 The two tissue ratios,  $Ratio_{epi}$  and  $Ratio_{stro}$ , that characterize the ratio of  
237 epithelial tissue areas and stromal tissue areas to overall tissue areas were estimated  
238 as:

$$239 \quad Ratio_{epi} = \frac{\sum_i^N E_i}{\sum_i^N T_i}, \quad Ratio_{stro} = \frac{\sum_i^N S_i}{\sum_i^N T_i} \quad (2)$$

240 where  $T_i$ ,  $E_i$  and  $S_i$  represent the number of pixels classified as foreground,  
241 epithelial and stromal in the  $i$ th valid patch in  $F_I$  respectively, and  $N$  represents  
242 the total number of valid patches in  $F_I$ .

243 To explore the relationships between gene expression data and tissue ratios in  
244 different breast cancer subtypes, we divided all TCGA samples into three types:  
245 ER-positive, ER-negative, and triple negative, as seen in **Table 1**. Then, we computed  
246 the Spearman correlation coefficients between gene expression data and the two tissue  
247 ratios  $Ratio_{epi}$  and  $Ratio_{stro}$  for each breast cancer subtype. Next, we sorted all  
248 the Spearman coefficients and selected the gene symbols which were in the top 1% of  
249 correlation coefficients with  $Ratio_{epi}$  and  $Ratio_{stro}$  for each breast cancer subtype.  
250 For the selected gene symbols, we performed Gene Ontology (GO) enrichment  
251 analysis on them using WebGestalt [23]. Meanwhile, the Overrepresentation  
252 Enrichment Analysis (ORA) with Bonferroni adjustment methods was also used to

253 determine statistical significance of the enrichment. Genes presented by the  
254 “Genome” platform were used as the reference gene. Finally, the top 10 enriched  
255 biological process categories were selected to reveal the biological process underlying  
256 the development of epithelial and stromal tissues for each breast cancer subtype.

## 257 **Results**

### 258 **Validation of CNN model**

259 We evaluated the effectiveness of our proposed deep CNN model on segmentation of  
260 epithelial and stromal tissues by testing and comparing our model with several  
261 state-of-the-art methods [11,12,24,25]. Our model outperformed all of these methods  
262 based on a comparison of classification accuracies and achieved an average accuracy  
263 of 91.02% on the whole sTMA dataset (NKI + VGH), as shown in **Table 2** and **Table**  
264 **3**. Visual segmentation results also demonstrated that our model could accurately  
265 classify epithelial and stromal tissues (**Figure 2**). Note that in the ground truth data,  
266 some areas belonging to epithelia have been overlooked and incorrectly annotated as  
267 background (an example is shown in the third row of **Figure 2**). However, our model  
268 still yielded correct predictions on this area (marked by a black circle in **Figure 2**).  
269 This indicates that our model is robust enough to make the right judgment, even under  
270 misleading supervision. We believe this is valuable for future work in biomedical  
271 image tasks with only partial or inaccurate annotations.

### 272 **Tissue segmentation and quantification on WSI**

273 We validated the trained CNN model on 171 image patches each from the TCGA  
274 breast cancer slide images annotated with epithelial/stromal tissues by two domain  
275 experts. The validation results indicated that our model was robust enough to predict  
276 credible tissue mask for the TCGA dataset (Table T1 and Figure S1). We then applied  
277 the trained CNN model to the tissue segmentation of 1,000 whole-slide images from  
278 three TCGA breast cancer subtypes. Visual results showed that our pipeline could  
279 robustly identify epithelial/stromal tissues in whole-slide images (**Figure 3**).

280 Ratios of epithelial and stromal tissue areas to overall tissue areas were estimated  
281 based on the WSI segmentation results. Wide differences in tissue ratios were seen  
282 among different breast cancer subtypes (**Figure 4**). ER-positive images were  
283 predominantly enriched with stromal tissues with a mean stromal ratio of 72.8%,  
284 while triple negative images were abundant in epithelial tissues with a mean epithelial  
285 ratio of 63.56%. Epithelial and stromal tissues were nearly equivalent for ER-negative  
286 images with mean ratios of 49.35% and 50.65%, respectively.

### 287 **Tissue-specific functional analysis**

288 We explored which genes contributed to the development of different tissues in  
289 various subtypes of breast cancers by computing pairwise Spearman correlation  
290 coefficients between gene expression data and both tissue ratios. Genes in the top 1%  
291 of correlation with tissue ratios in each subtype of breast cancer were selected for  
292 further analysis. We then performed functional Gene Ontology (GO) analysis for the  
293 selected gene-sets. Genes correlated with the epithelial tissues were enriched in  
294 biological processes during the cell cycle, among which sister chromatid segregation,  
295 nuclear division, and mitotic cell cycle are the most commonly enriched GO terms  
296 shared by the three breast cancer subtypes. However, we also observed specifically  
297 enriched GO terms and genes for each subtype that correspond to different cell cycle  
298 stages. The Growth phase related genes including G1 phase and G2 phase were  
299 specifically enriched for the ER-positive subtype, whereas Mitotic phase genes were  
300 specifically enriched for the triple negative subtype, and S phase related genes were  
301 specific for the ER-negative subtype.

302 Similarly, such patterns of shared high-level biological processes with specific  
303 functions were also observed for the stromal tissues. For the stromal tissue, the most  
304 significantly enriched GO biological process terms were all related to the  
305 development of the tumor microenvironment, including vasculature development,  
306 cellular component movement, and growth factor stimuli-related GO functions which  
307 were shared among the three breast cancer subtypes. For the ER-positive subtype,

308 angiogenesis-related genes were specifically enriched, while for the triple negative  
309 subtype, muscle structure genes (especially the ones related to actin fibers and  
310 cytoskeleton) were specifically enriched. In addition, for the ER-negative subtype,  
311 growth factor genes were enriched. Altogether, our results (**Figure 5**) suggest that  
312 even though the same tissue was associated with similar biological processes in  
313 different subtypes, each subtype still had its idiosyncratic biological processes  
314 governing the development of these tissues.

### 315 **Other applications**

316 Our WSI processing pipeline can be easily applied to histological images of other  
317 types of cancers. The global tissue segmentation maps we have presented could also  
318 be used for other more specific computational analysis. For example, global  
319 morphological features of different tissues could be estimated for better survival  
320 prediction [22,26], and lymphocytes in different tissues could be distinguished for  
321 observation of more detailed immune response. Imaging data resources have not been  
322 exploited to the degree of the other TCGA molecular and clinical outcome resources,  
323 likely because automatic image annotation is still impeded by data volume challenges.  
324 In this manuscript we presented global tissue maps of all the TCGA breast cancer  
325 WSI, and it is our aspiration that they will facilitate further exploration and utilization  
326 of these imaging data for various cancers.

### 327 **Conclusions**

328 Epithelial and stromal regions of tumors, as well as their spatial characterizations in  
329 histopathology images, play a very important role in cancer diagnosis, prognosis, and  
330 treatment. Recently, some research studies have focused on developing systems for  
331 automatically analyzing H&E stained histological images from tissue microarrays in  
332 order to predict prognosis [26,27]. In contrast, our approach is aimed at whole slide  
333 images (WSI) rather than manually extracted regions since WSI provide much more  
334 comprehensive information, including heterogeneity. Mackie et al. [28] summarized  
335 the research progress and challenges facing the application of big data quantitative

336 imaging to cancer treatment, focusing on 3D imaging modalities including CT, PET,  
337 and MRI. Our quantitative analysis of histopathology images complements and  
338 extends this work in terms of data modality and size, application areas, and  
339 computational challenges.

340 Based on our global tissue quantification, distinct differences were observed in the  
341 enriched GO terms for epithelial and stromal tissues [29]. At the same time, highly  
342 overlapping biological properties were observed in the same tissue across different  
343 subtypes, all tied to cancer progression in one way or another. For example, in  
344 epithelial tissue, genes from cell cycle-related processes were significantly enriched.  
345 Previous studies have addressed that sustaining proliferative signaling is one of the  
346 hallmarks of cancer, during which cell cycle plays quite an important role [30]. In  
347 addition, *CDK4/6* inhibitors (such as Palbociclib and ribociclib) target this biological  
348 process [31,32]. For stromal tissue, genes related to the tumor microenvironment were  
349 significantly enriched (e.g., vasculature and locomotion). Vasculature is vital for  
350 inducing angiogenesis, which is another important hallmark of cancer.

351 Additionally, we observed differences in biological processes between different  
352 subtypes resulting from tumor heterogeneity. Specific biological process features for  
353 each subtype were also identified among the same tissue. For epithelial tissue, genes  
354 associated with different stages of the cell cycle were specifically enriched for  
355 different subtype. For ER-positive breast epithelia, we found that G1 and G2  
356 phase-related GO terms were enriched, among which G2/M transition is an important  
357 element. Wang et al. [27] have highlighted the importance of G2/M transition in  
358 ER-positive breast cancer. For the triple negative subtype, we found that M phase  
359 related GO terms were enriched, during which chromosome segregation plays a key  
360 role. Witkiewicz et al. [33] have shown the close relationship between chromosome  
361 segregation (*PLK1*) with triple negative Breast Cancer. Similarly, angiogenesis  
362 related biological processes were significantly associated with the stroma of the  
363 ER-positive subtype. Previous studies have indicated that vasculature is one of the

364 important components for tumor stroma [34], as stromal cells can build blood vessels  
365 to supply oxygen and nutrients [35].

366 While the correlation analysis of this study reveals clear pairwise relationships  
367 between morphological and genomic features, there are two major limitations to our  
368 approach. First, correlation cannot reveal highly nonlinear relationships or  
369 multivariate complication relationships. For instance, Wang et al. [36] demonstrated  
370 that complicated morphological features might need to be modeled using multiple  
371 genomic features, implying contributions from multiple genetic factors. Similarly,  
372 with our data, more sophisticated analysis such as nonlinear correlation analysis can  
373 be applied to reveal deeper relationships. Secondly, correlation is not causation. The  
374 genes that are strongly correlated with the stromal or epithelial content may not be the  
375 underlying driver genes for the development of the tissues. Identification of such key  
376 genes requires further incorporation of biological knowledge, as well as future  
377 experimental validation.

378 In summary, our framework provides not only fully automatic and detailed analysis  
379 for large H&E stained images based on a state-of-the-art deep learning model, but  
380 also integrated analysis of image features and molecular data. The proposed  
381 framework enables us to effectively explore the underlying relationships between  
382 gene expression and tissue quantification, free from the extensive labelling and  
383 annotation that is laborious even to skilled pathologists.

384 The details about code and data in this manuscript is provided on Github with the link  
385 at <https://github.com/Serian1992/ImgBio>.

386

### 387 **Authors' contributions**

388 LZ carried out the pathology image processing, participated in the genetic studies and  
389 drafted the manuscript. ZX carried out the enrichment analysis and helped to draft the  
390 manuscript. WY participated in the development of methodology. CJ participated in  
391 the acquisition of data. SW participated in the development of methodology. HZ  
392 participated in the acquisition of data and the development of methodology. ZJ and  
393 DN participated in the review and revision of the manuscript. FQ participated in the  
394 development of methodology and helped to review and revise the manuscript. HK  
395 conceived of the study, and participated in its design and coordination, reviewed and  
396 edited the manuscript. All authors read and approved the final manuscript.

397

### 398 **Competing interests**

399 The authors have declared no competing interests.

400

### 401 **Acknowledgements**

402 This work was supported by Indiana University Precision Health Initiative to HK and  
403 ZJ, the NSFC-Guangdong United Found of China (No. U1501256) to FQ, and  
404 Shenzhen Peacock Plan (No. KQTD2016053112051497) to ZX and DN. We thank  
405 Dr. Natalie Lambert, Dr. Bryan Helm and Ms. Megan Metzger for their tremendous  
406 help in the discussion and editing of the manuscript.



407 **Reference**

- 408 [1] Arendt LM, Rudnick JA, Keller PJ, Kuperwasser C. Stroma in breast  
409 development and disease. *Semin Cell Dev Biol* 2010;21:11–8.
- 410 [2] de Kruijf EM, van Nes JGH, van de Velde CJH, Putter H, Smit VTHBM,  
411 Liefers GJ, et al. Tumor--stroma ratio in the primary tumor is a prognostic  
412 factor in early breast cancer patients, especially in triple-negative carcinoma  
413 patients. *Breast Cancer Res Treat* 2011;125:687–96.
- 414 [3] Toss MS, Miligy I, Al-Kawaz A, Alsleem M, Khout H, Rida PC, et al.  
415 Prognostic significance of tumor-infiltrating lymphocytes in ductal carcinoma  
416 in situ of the breast. *Mod Pathol* 2018;31(8):1226.
- 417 [4] Fouad S, Randell D, Galton A, Mehanna H, Landini G. Epithelium and Stroma  
418 Identification in Histopathological Images Using Unsupervised and  
419 Semi-Supervised Superpixel-Based Segmentation. *J Imaging* 2017;3.
- 420 [5] Haridas A, Bunyak F, Palaniappan K. Interactive Segmentation Relabeling for  
421 Classification of Whole-Slide Histopathology Imagery. 2015 IEEE 28th Int.  
422 Symp. Comput. Med. Syst., 2015, p. 84–7.
- 423 [6] Bunyak F, Hafiane A, Al-Milaji Z, Ersoy I, Haridas A, Palaniappan K. A  
424 segmentation-based multi-scale framework for the classification of epithelial  
425 and stromal tissues in H E images. 2015 IEEE Int. Conf. Bioinforma. Biomed.,  
426 2015, p. 450–3.
- 427 [7] He K, Zhang X, Ren S, Sun J. Deep residual learning for image recognition.  
428 *Proc. IEEE Conf. Comput. Vis. pattern Recognit.*, 2016, 39(7): 1476-81.
- 429 [8] Ren S, He K, Girshick R, Sun J. Faster R-CNN: Towards Real-Time Object  
430 Detection with Region Proposal Networks. In: Cortes C, Lawrence ND, Lee  
431 DD, Sugiyama M, Garnett R, editors. *Adv. Neural Inf. Process. Syst.* 28,  
432 Curran Associates, Inc.; 2015, p. 91–9.
- 433 [9] Shelhamer E, Long J, Darrell T. Fully Convolutional Networks for Semantic  
434 Segmentation. *IEEE Trans Pattern Anal Mach Intell* 2017;39:640–51.

- 435 [10] Chen L-C, Papandreou G, Kokkinos I, Murphy K, Yuille AL. Deeplab:  
436 Semantic image segmentation with deep convolutional nets, atrous  
437 convolution, and fully connected crfs. *IEEE Trans Pattern Anal Mach Intell*  
438 2018;40:834–48.
- 439 [11] Al-Milaji Z, Ersoy I, Hafiane A, Palaniappan K, Bunyak F. Integrating  
440 segmentation with deep learning for enhanced classification of epithelial and  
441 stromal tissues in H&E images. *Pattern Recognit Lett* 2019;119:214–21.
- 442 [12] Xu J, Luo X, Wang G, Gilmore H, Madabhushi A. A Deep Convolutional  
443 Neural Network for segmenting and classifying epithelial and stromal regions  
444 in histopathological images. *Neurocomputing* 2016;191:214–23.
- 445 [13] Farahani N, Parwani A V, Pantanowitz L. Whole slide imaging in pathology:  
446 advantages, limitations, and emerging perspectives. *Pathol Lab Med Int*  
447 2015;7:23–33.
- 448 [14] Ronneberger O, Fischer P, Brox T. U-net: Convolutional networks for  
449 biomedical image segmentation. *Lect Notes Comput Sci (Including Subser*  
450 *Lect Notes Artif Intell Lect Notes Bioinformatics)* 2015;9351:234–41.
- 451 [15] Bejnordi BE, Zuidhof GCA, Balkenhol M, Hermsen M, Bult P, van Ginneken  
452 B, et al. Context-aware stacked convolutional neural networks for classification  
453 of breast carcinomas in whole-slide histopathology images. *CoRR*  
454 2017;abs/1705.0.
- 455 [16] Hou L, Samaras D, Kurc TM, Gao Y, Davis JE, Saltz JH. Patch-based  
456 convolutional neural network for whole slide tissue image classification. *Proc.*  
457 *IEEE Conf. Comput. Vis. Pattern Recognit.*, 2016, p. 2424–33.
- 458 [17] Saltz J, Gupta R, Hou L, Kurc T, Singh P, Nguyen V, et al. Spatial organization  
459 and molecular correlation of tumor-infiltrating lymphocytes using deep  
460 learning on pathology images. *Cell Rep* 2018;23:181.
- 461 [18] Li J, Lu Y, Akbani R, Ju Z, Roebuck PL, Liu W, et al. TCPA: a resource for  
462 cancer functional proteomics data. *Nat Methods* 2013;10:1046.

- 463 [19] Akbani R, Ng PKS, Werner HMJ, Shahmoradgoli M, Zhang F, Ju Z, et al. A  
464 pan-cancer proteomic perspective on The Cancer Genome Atlas. *Nat Commun*  
465 2014;5:3887.
- 466 [20] Cheng J, Mo X, Wang X, Parwani A, Feng Q, Huang K. Identification of  
467 topological features in renal tumor microenvironment associated with patient  
468 survival. *Bioinformatics* 2017;34:1024–30.
- 469 [21] Cheng J, Zhang J, Han Y, Wang X, Ye X, Meng Y, et al. Integrative analysis  
470 of histopathological images and genomic data predicts clear cell renal cell  
471 carcinoma prognosis. *Cancer Res* 2017;77:e91--e100.
- 472 [22] Shao W, Cheng J, Sun L, Han Z, Feng Q, Zhang D, et al. Ordinal Multi-modal  
473 Feature Selection for Survival Analysis of Early-Stage Renal Cancer: 21st  
474 International Conference, Granada, Spain, September 16–20, 2018,  
475 Proceedings, Part II, 2018, p. 648–56.
- 476 [23] Wang J, Vasaikar S V, Shi Z, Greer M, Zhang B. WebGestalt 2017: a more  
477 comprehensive, powerful, flexible and interactive gene set enrichment analysis  
478 toolkit. *Nucleic Acids Res.*, 2017;45(W1):W130-W137.
- 479 [24] Du Y, Zhang R, Zargari A, Thai TC, Gunderson CC, Moxley KM, et al. A  
480 performance comparison of low-and high-level features learned by deep  
481 convolutional neural networks in epithelium and stroma classification. *Med.*  
482 *Imaging* 2018 *Digit. Pathol.*, vol. 10581, 2018, p. 1058116.
- 483 [25] Vu QD, Kwak JT. A Dense Multi-Path Decoder for Tissue Segmentation in  
484 Histopathology Images. *Comput Methods Programs Biomed*  
485 2019;173:119--129.
- 486 [26] Beck AH, Sangoi AR, Leung S, Marinelli RJ, Nielsen TO, van de Vijver MJ, et  
487 al. Systematic Analysis of Breast Cancer Morphology Uncovers Stromal  
488 Features Associated with Survival. *Sci Transl Med* 2011;3:108ra113-108ra113.
- 489 [27] Wang C, Pécot T, Zynger DL, Machiraju R, Shapiro CL, Huang K. Identifying  
490 survival associated morphological features of triple negative breast cancer

- 491 using multiple datasets. *J Am Med Informatics Assoc* 2013;20:680–7.
- 492 [28] Mackie TR, Jackson EF, Giger M. Opportunities and challenges to utilization  
493 of quantitative imaging: Report of the AAPM practical big data workshop. *Med*  
494 *Phys* 2018;45:e820–8.
- 495 [29] Hoadley KA, Yau C, Hinoue T, Wolf DM, Lazar AJ, Drill E, et al.  
496 Cell-of-Origin Patterns Dominate the Molecular Classification of 10,000  
497 Tumors from 33 Types of Cancer. *Cell* 2018;173:291–304.e6.
- 498 [30] Hanahan D, Weinberg RA. Hallmarks of Cancer: The Next Generation. *Cell*  
499 2011;144:646–74.
- 500 [31] Rocca A, Farolfi A, Bravaccini S, Schirone A, Amadori D. Palbociclib (PD  
501 0332991): targeting the cell cycle machinery in breast cancer. *Expert Opin*  
502 *Pharmacother* 2014;15:407–20.
- 503 [32] Murphy CG, Dickler MN. The role of CDK4/6 inhibition in breast cancer.  
504 *Oncologist* 2015;20:483–90.
- 505 [33] Witkiewicz AK, Chung S, Brough R, Vail P, Franco J, Lord CJ, et al.  
506 Targeting the Vulnerability of RB Tumor Suppressor Loss in Triple-Negative  
507 Breast Cancer. *Cell Rep* 2018;22:1185–99.
- 508 [34] Bremnes RM, Donnem T, Al-Saad S, Al-Shibli KI, Andersen S, Sirera R, et al.  
509 The role of tumor stroma in cancer progression and prognosis: emphasis on  
510 carcinoma-associated fibroblasts and non-small cell lung cancer. *J Thorac*  
511 *Oncol* 2011;6 1:209–17.
- 512 [35] Ghesquière B, Wong BW, Kuchnio A, Carmeliet P. Metabolism of stromal and  
513 immune cells in health and disease. *Nature* 2014;511:167–76.
- 514 [36] Wang C, Su H, Yang L, Huang K. Integrative analysis for lung  
515 adenocarcinoma predicts morphological features associated with genetic  
516 variations. *PACIFIC Symp. Biocomput.* 2017, 2017, p. 82–93.

517 **Figure legends**

518 **Figure 1 Workflow for image processing and biological analysis**

519 **A.** Detailed structure of our deep CNN model for segmentation. **B.** Whole-slide image  
520 processing pipeline. **C.** Overview of biological analysis of gene expression data and  
521 image features.

522 **Figure 2 Segmentation results on TMA**

523 Column (a) are raw images; column (b) are annotations by pathologists; column (c)  
524 are predictions of the proposed model. Red, green and black areas in column (b) and  
525 (c) represent epithelial, stromal and background regions in raw images, respectively.  
526 Note that in the last row, the overlooked tumor area (Marked with black circle) is still  
527 well recognized by our model.

528 **Figure 3 Segmentation results on TCGA WSIs**

529 For each TCGA whole-slide image **A, B, C: Step 1** represents the WSI; **Step 2**  
530 represents the background map of WSI; **Step 3** represents the region of interest (ROI)  
531 in the WSI of raw resolution; **Step 4** represents the tissue segmentation result of ROI.  
532 Red, green and black areas in **Step 4** represent the predicted epithelial, stromal and  
533 background regions, respectively.

534 **Figure 4 Tissue distribution on different breast cancer subtypes**

535 The Variable Epithelial\_ratio, Stromal\_ratio represent the ratios of epithelial tissue  
536 areas and stromal tissue areas to overall tissue areas, respectively.

537 **Figure 5 Results of GO enrichment analysis**

538 Dots represent most significantly enriched Biological Process term for each cancer  
539 subtype with color coding: purple indicates high enrichment, red indicates low  
540 enrichment. Sizes of dots represent the ratio of enrichment (GO category). FDR is the  
541 method used for multiple comparison correction.

542 **Tables**

543 **Table 1 Demographic and clinical characteristics**

544 *Note:* For TCGA cohort, samples in Triple Negative subgroup also belong to  
545 ER-negative subgroup.

546 **Table 2 Evaluation of CNN model on NKI and VGH**

547 *Note:* From the third to the last column are the ten evaluations metrics. Value in bold  
548 represents the best result under each metric among different models.

549 \* TPR (True positive rate) =  $TP / (TP + FN)$ ; TNR (True negative rate) =  $TN / (FP +$   
550  $TN)$ ; PPV (Positive Predictive Value) =  $TP / (TP + FP)$ ; NPV (Negative Predictive  
551 Value) =  $TN / (FN + TN)$ ; FPR (False positive rate) =  $FP / (FP + TN)$ ; FDR (False  
552 Discovery Rate) =  $1 - TP / (TP + FP)$ ; FNR(False Negative Rate) =  $FN / (FN + TP)$ ;  
553 ACC (Accuracy) =  $(TP + TN) / (TP + FP + TN + FN)$ ; F1\_score =  $2*TP / (2*TP + FP$   
554  $+ FN)$ ; MCC (Matthews Correlation Coefficient) =  $(TP * TN - FP * FN) /$   
555  $\sqrt{(TP + FP) * (TP + FN) * (TN + FP) * (TN + FN)}$ . TP, FP, TN and FN represent  
556 the true positive, false positive, true negative and false negative, respectively.

557 **Table 3 Quantitative evaluation on the whole TMA dataset**

558 **Supplementary material**

559 **Figure S1 Qualitative segmentation results on TCGA dataset**

560 The first column are the raw TCGA images; the second column are annotations by  
561 pathologists; the third column are predictions of the proposed model. Red, green and  
562 black areas in the annotations and predictions represent epithelial, stromal and  
563 background regions in raw images, respectively.

564 **Table T1 Quantitative evaluation on TCGA dataset**

565 \* TPR (True positive rate) =  $TP / (TP + FN)$ ; TNR (True negative rate) =  $TN / (FP +$   
566  $TN)$ ; FPR (False positive rate) =  $FP / (FP + TN)$ ; FNR(False Negative Rate) =  $FN /$   
567  $(FN + TP)$ ; ACC (Accuracy) =  $(TP + TN) / (TP + FP + TN + FN)$ ; F1\_score =  $2*TP /$   
568  $(2*TP + FP + FN)$ . TP, FP, TN and FN represent the true positive, false positive, true  
569 negative and false negative, respectively.

570 **Table 1 Demographic and clinical characteristics**

| <b>Cohort</b> | <b>SubGroup</b> | <b>Image Type</b>                        | <b>Image Number</b> | <b>Total</b> |
|---------------|-----------------|------------------------------------------|---------------------|--------------|
| TMA           | NKI             | H&E stained image<br>region (1128 * 720) | 106                 | 157          |
|               | VGH             |                                          | 51                  |              |
| TCGA          | ER-positive     | Whole-slide image                        | 773                 | 1000         |
|               | ER-negative     |                                          | 227                 |              |
|               | Triple negative |                                          | 112                 |              |

571 *Note:* For TCGA cohort, samples in Triple Negative subgroup also belong to  
572 ER-negative subgroup.



573 **Table 2 Evaluation of CNN model on NKI and VGH**

| Datasets   | Models        | TPR          | TNR          | PPV          | NPV          | FPR          | FDR         | FNR         | ACC          | F1           | MCC          |
|------------|---------------|--------------|--------------|--------------|--------------|--------------|-------------|-------------|--------------|--------------|--------------|
| <b>NKI</b> | Xu.et [12]    | 86.31        | 82.15        | 84.11        | 84.60        | 17.85        | 15.89       | 13.66       | 84.34        | 85.21        | 68.60        |
|            | CNN only [11] | 81.34        | 82.89        | 84.11        | 80.05        | 17.11        | 15.89       | 18.57       | 81.69        | 82.75        | 64.24        |
|            | CNN+HFCM [11] | 89.48        | 85.96        | 85.94        | 89.50        | 14.04        | 14.06       | 10.52       | 87.19        | 87.68        | 75.44        |
|            | Our model     | <b>90.71</b> | <b>89.83</b> | <b>90.81</b> | <b>89.72</b> | <b>10.17</b> | <b>9.19</b> | <b>9.29</b> | <b>90.29</b> | <b>90.76</b> | <b>80.54</b> |
| <b>VGH</b> | Xu.et [12]    | 88.29        | 88.40        | 89.93        | 86.55        | 11.60        | 10.07       | 11.71       | 88.34        | 89.10        | 76.59        |
|            | CNN only [11] | 90.32        | 88.15        | 92.98        | 83.97        | 11.85        | 7.02        | 9.68        | 89.14        | 91.63        | 77.70        |
|            | CNN+HFCM [11] | <b>91.96</b> | <b>92.21</b> | <b>95.45</b> | 86.59        | <b>7.79</b>  | <b>4.55</b> | <b>8.04</b> | 91.04        | <b>93.67</b> | <b>83.10</b> |
|            | Our model     | 91.37        | 91.49        | 92.37        | <b>90.38</b> | 8.51         | 7.63        | 8.63        | <b>91.42</b> | 91.87        | 82.80        |

574 *Note:* From the third to the last column are the ten evaluations metrics. Value in bold  
 575 represents the best result under each metric among different models.

576 \*TPR (True positive rate) =  $TP / (TP + FN)$ ; TNR (True negative rate) =  $TN / (FP +$   
 577  $TN)$ ; PPV (Positive Predictive Value) =  $TP / (TP + FP)$ ; NPV (Negative Predictive  
 578 Value) =  $TN / (FN + TN)$ ; FPR (False positive rate) =  $FP / (FP + TN)$ ; FDR (False  
 579 Discovery Rate) =  $1 - TP / (TP + FP)$ ; FNR(False Negative Rate) =  $FN / (FN + TP)$ ;  
 580 ACC (Accuracy) =  $(TP + TN) / (TP + FP + TN + FN)$ ; F1\_score =  $2 * TP / (2 * TP + FP$   
 581  $+ FN)$ ; MCC (Matthews Correlation Coefficient) =  $(TP * TN - FP * FN) /$   
 582  $\sqrt{(TP + FP) * (TP + FN) * (TN + FP) * (TN + FN)}$ . TP, FP, TN and FN represent  
 583 the true positive, false positive, true negative and false negative, respectively.

584 **Table 3 Quantitative evaluation on the whole TMA dataset**

| <b>Dataset</b> | <b>Model</b> | <b>ACC</b> | <b>F1_score</b> |
|----------------|--------------|------------|-----------------|
| NKI +VGH       | Du.et [24]   | 89.7       | 89.7            |
|                | Vu.et [25]   | 90.315     | 90.51           |
|                | Our model    | 91.02      | 91.59           |

585

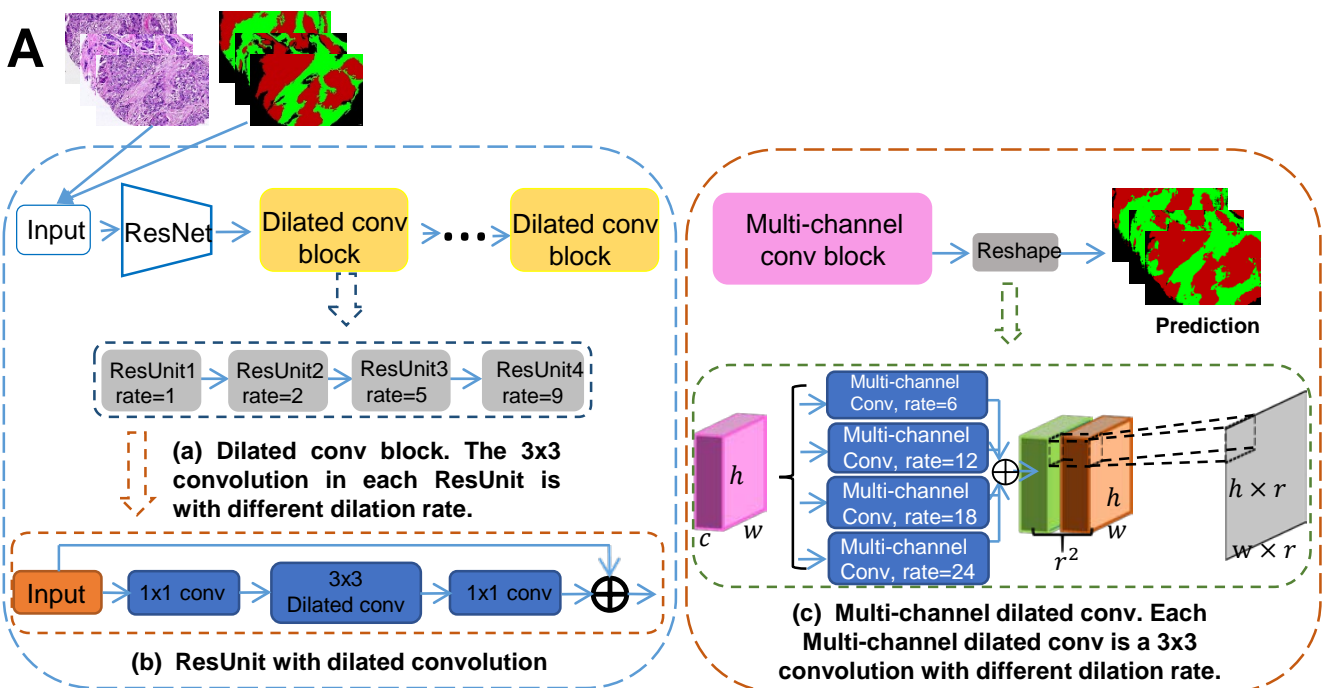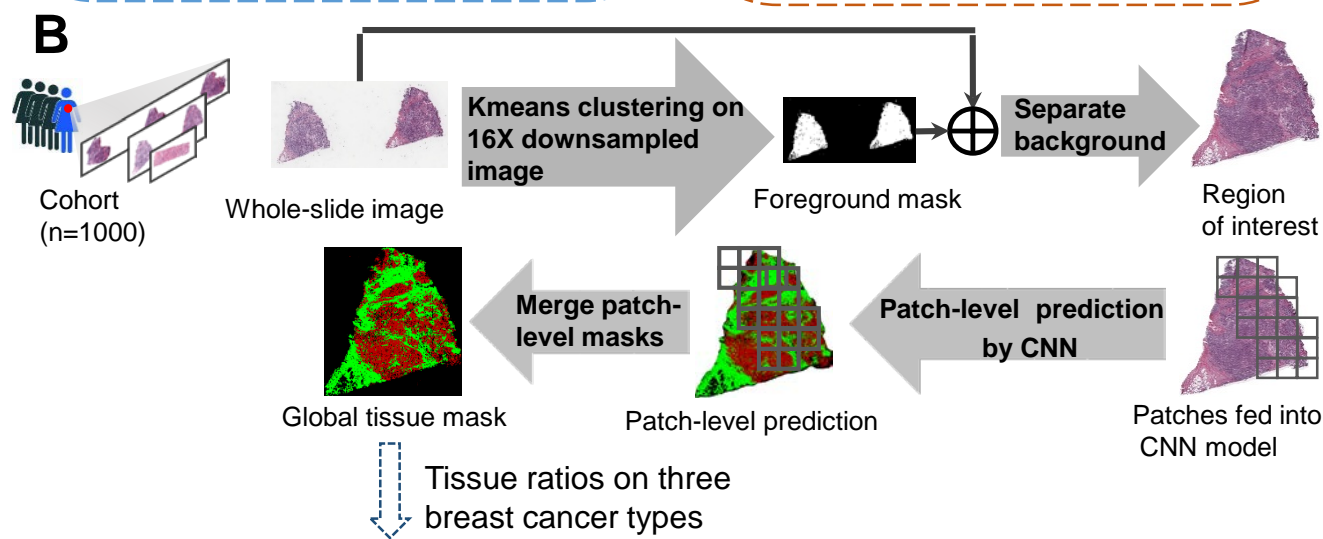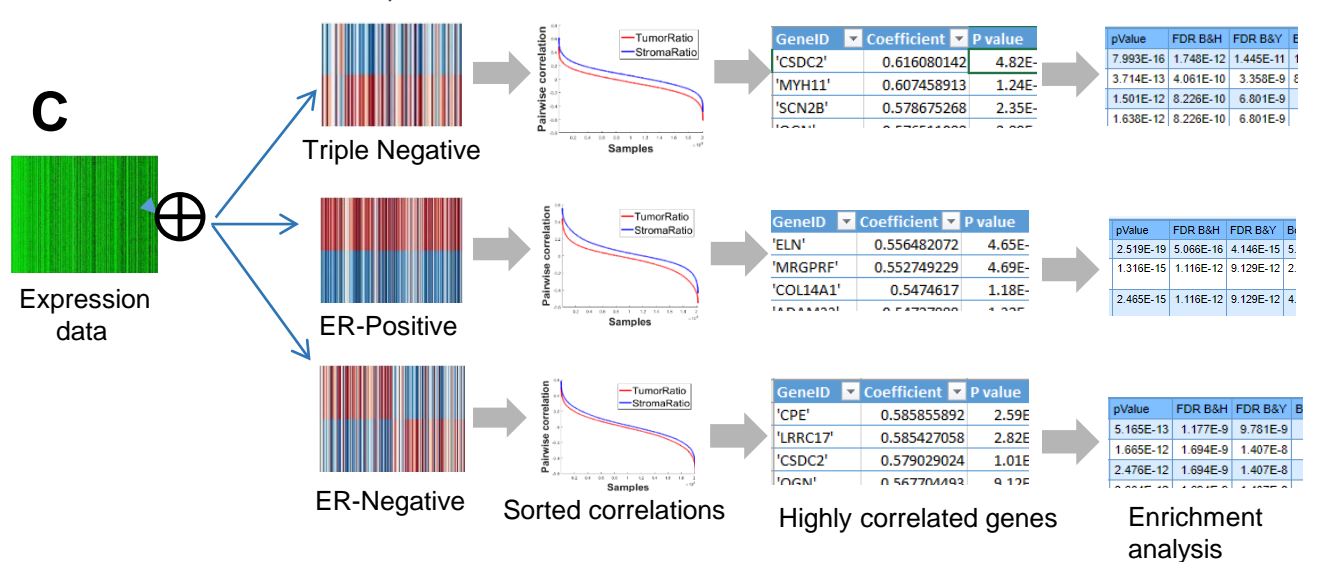

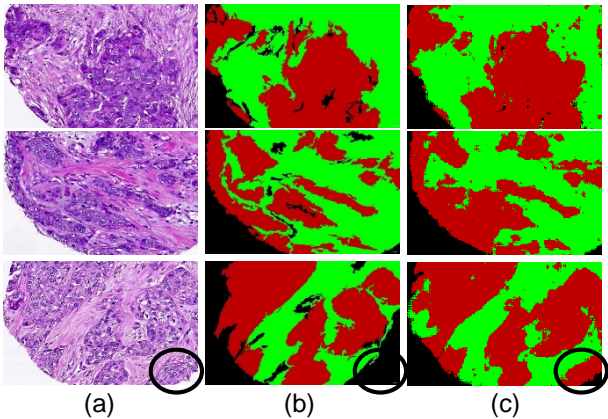

**A****Step1**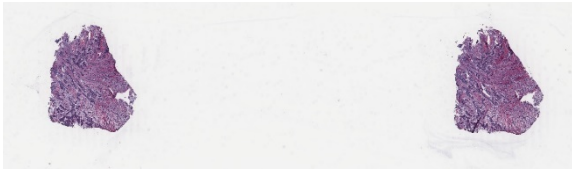**Step2**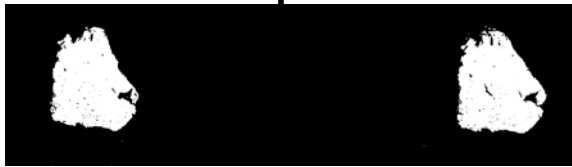**Step3**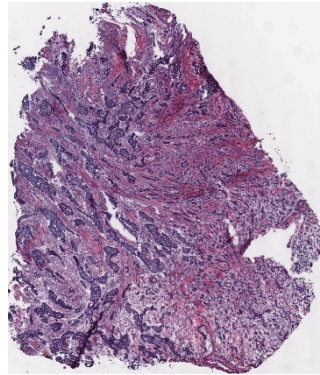**Step4**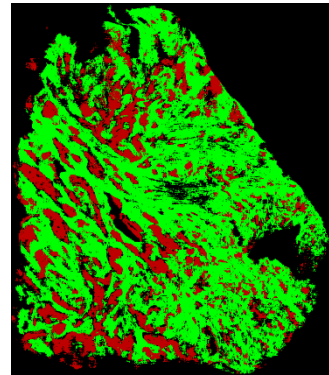**B****Step1**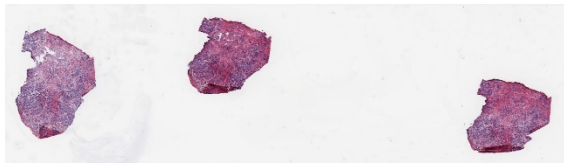**Step2**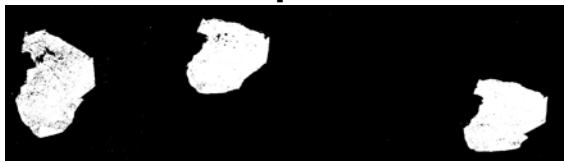**Step3**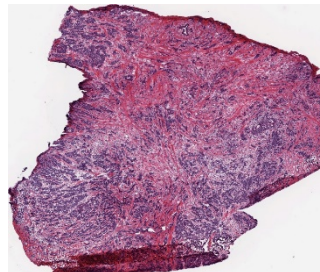**Step4**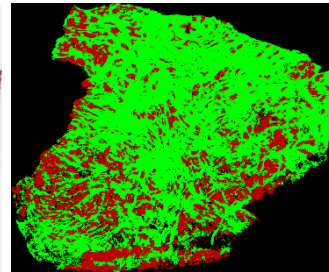**C****Step1**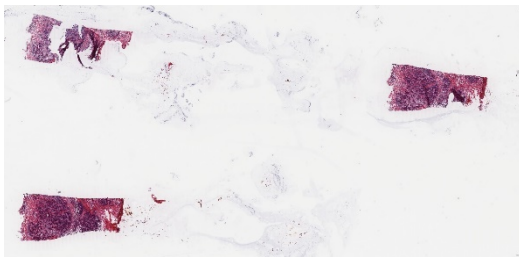**Step2**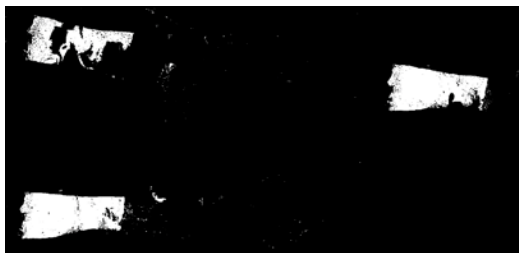**Step3**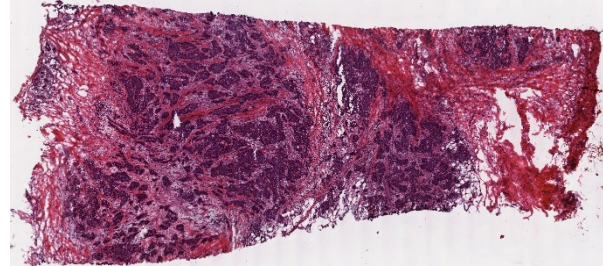**Step4**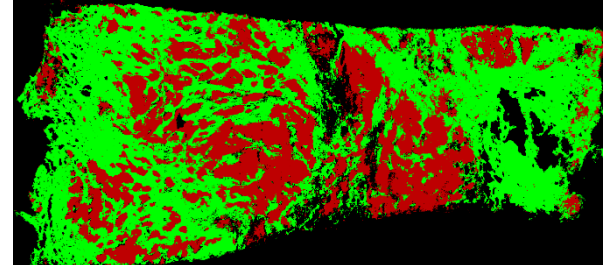

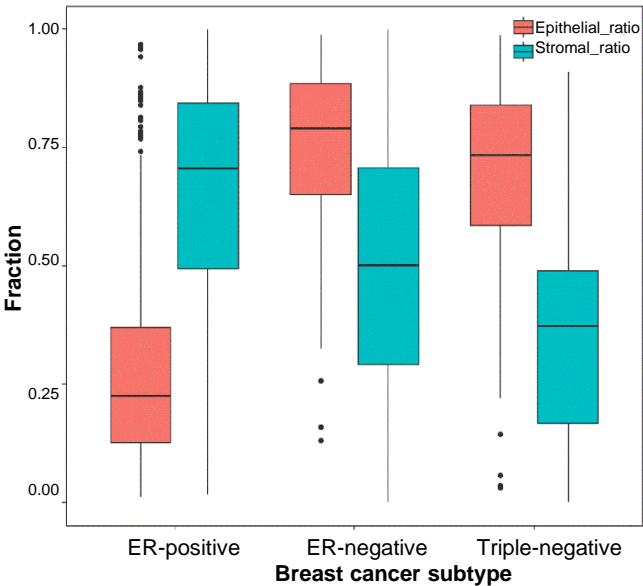

GO\_name

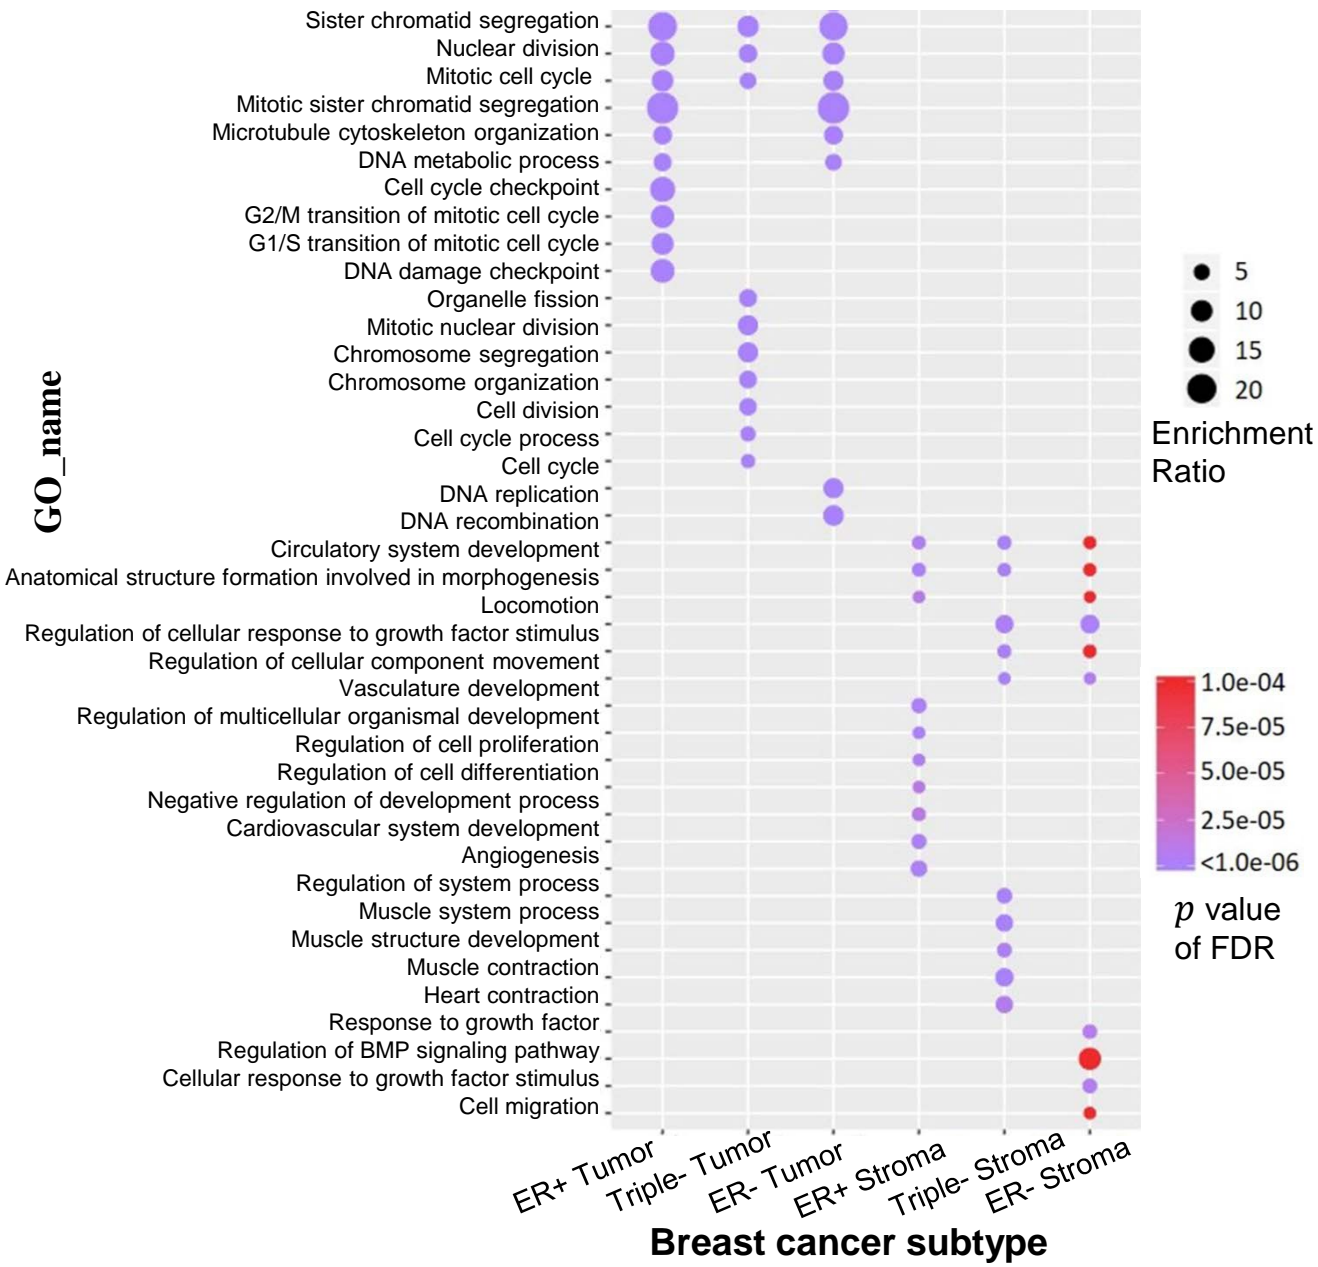

Source: https://www.biorxiv.org/content/10.1101/2020.03.10.985887v1.full.pdf
